# Supplementary material for: Gibberellin Signaling Promotes the Secondary Growth of Storage Roots in Panax ginseng
Source: MDPI journal article supplement (doi:10.3390/ijms22168694), 2021-08-13
Supplement: s1 [file s1]

**Supplementary Table S5 . Primer combinations for gene cloning**

| Gene name    | Sequences (5` to 3`)                  |
|--------------|---------------------------------------|
| <i>GID1A</i> | F : CGGGATCCATGGCTGGAAGTAGTGGTATTA    |
|              | R : AAGGCCTACAGTCAGAACCCACAAAGC       |
| <i>GID1B</i> | F : CGGGATCCATGGCTGGAAGTAATGGAATTAATC |
|              | R : AAGGCCTACAGTCAGAACCCACAAAGC       |
| <i>GID1C</i> | F : AGATCTATGGCTGGGAGTAATGAAATTAATC   |
|              | R : AGGCCTGTAGGAACATACAAAACCTTTTATCTC |
| <i>GID1D</i> | F : GGATCCATGGCTGGTAGTAATGAAGTTAACG   |
|              | R : CCCGGGACAGTTAGGATTCACAAAGTTTTTTA  |
| <i>RGA1</i>  | F : AGATCTATGAAGAGAGACTACCCACAACCTAA  |
|              | R : AAGGCCTACCACTGAGTTTCCACGC         |
| <i>RGA2</i>  | F : CGGGATCCATGAAGCGAGACTATCCACAAC    |
|              | R : AAGGCCTACCACTGAGTTTCCAGGCTG       |
| <i>RGA3</i>  | F : AGATCTATGAAGAGAGACTACCCACAGC      |
|              | R : AGGCCTACCACTGAGTTTCCACGC          |
| <i>RGA4</i>  | F : AGATCTATGGTTATTAAGAGAGATCGCGAGC   |
|              | R : AGTACTCGGAGCTTCAGCAGCG            |
| <i>RGA5</i>  | F : AGATCTATGGTTATTAAGAGAGATCGCGAGC   |
|              | R : AGTACTCGGAGCTTCAGCAGCG            |
