# Supplementary material for: Gibberellin Signaling Promotes the Secondary Growth of Storage Roots in Panax ginseng
Source: MDPI journal article supplement (doi:10.3390/ijms22168694), 2021-08-13
Supplement: s1 [file s1]

## Supplementary Figure S1

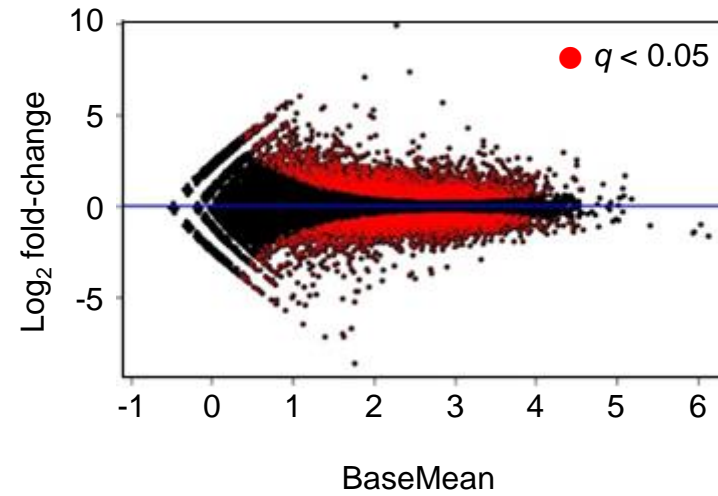

**Figure S1.** MA plot of differential expression between DMSO- and GA-treated samples. Red dots represent the either up- (2,805) and down- (2,916) regulated genes with  $q < 0.05$  and  $\geq |1.5|$ -fold change.

# Supplementary Figure S2

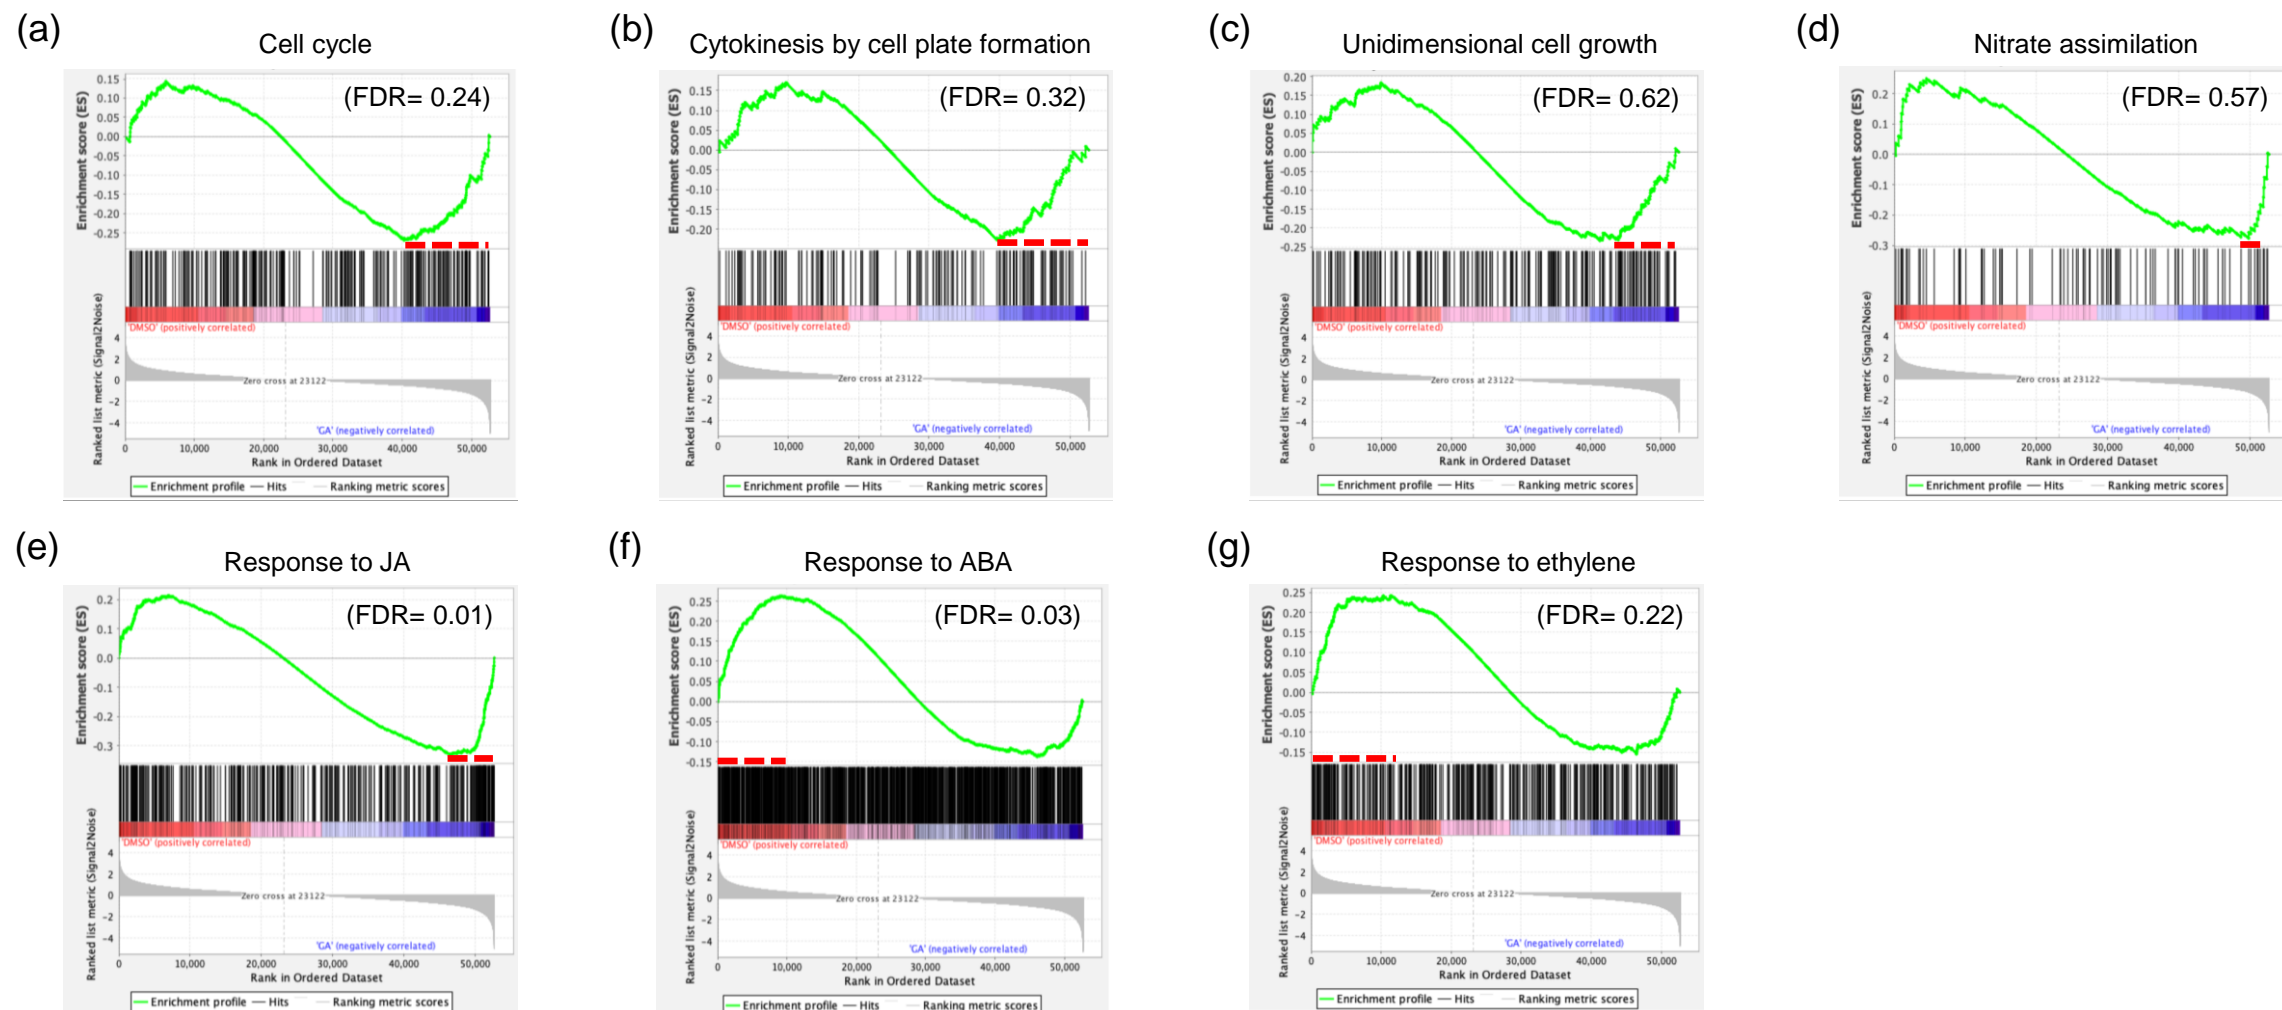

**Figure S2.** Enrichment plot for cell cycle, cytokinesis, cell growth, nitrate assimilation, and response to plant hormones using GSEA. In the plot, red dot line (---) indicates a leading-edge subset of the enriched gene set group leading to enrichment scores with respect to expression changes.

Supplementary Figure S3

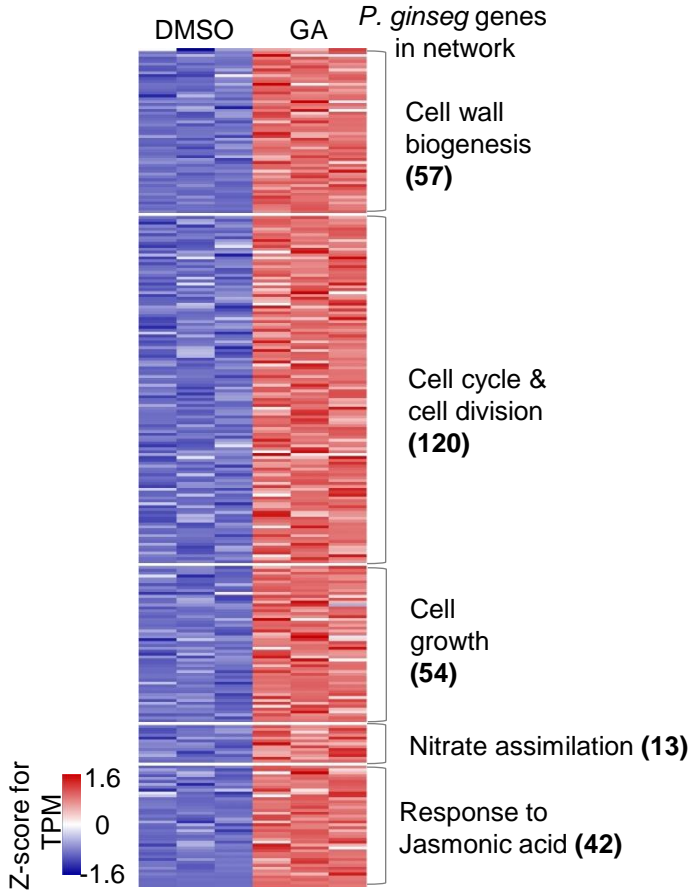

**Figure S3.** Expression heatmap of up-regulated genes contained in GA-induced transcriptional network.
