# Supplementary material for: Gibberellin Signaling Promotes the Secondary Growth of Storage Roots in Panax ginseng
Source: Int J Mol Sci. 2021 Aug 13;22(16):8694. doi: 10.3390/ijms22168694 (PMC8395461; doi:10.3390/ijms22168694)
Supplement: Supplementary file 1 [file ijms-22-08694-s001.zip › SupplementaryTables.xlsx]

## Sheet: Table S1
Supplementary Table S1. Summary of RNA-Seq used in the study
Sample ID	NCBI SRA accession no.	No. of raw reads	%Q30	No.of trimmed reads	No. of mapped reads	Mapping rate (%)
DMSO-1	SRX6449905	55517040	96.49	52791946	51481569	0.9752
DMSO-2	SRX6449904	64112982	96.66	61186562	59684653	0.9755
DMSO-3	SRX6449907	52086640	96.72	49731336	48530611	0.9759
GA-1	SRX6449903	52221708	96.54	49700570	48406132	0.974
GA-2	SRX6449902	60147050	96.7	57409936	55886579	0.9735
GA-3	SRX6449908	59683252	96.71	57009646	55562265	0.9746

## Sheet: Table S2
Supplementary Table S2. Expression of genes enriched in plant-type secondary cell wall biogenesis that was identified by GSEA
Gene ID	Gene name	Homologous TAIR gene ID (v10)	Rank in gene list (GSEA)	Rank metric score (GSEA)	Running enrichment score (ES)	Core enrichment (Yes or No)	Expression value (TPM)						Differential expression (GA/DMSO)		DEG
							DMSO-1	DMSO-2	DMSO-3	GA-1	GA-2	GA-3	Log2 Fold-change	q-value	(q < 0.05, ≥1.5-FC)
Pg_S0804.30	RWA3	AT2G34410	44170	-0.676	-0.5922	Yes	115.985	131.034	167.747	182.209	160.194	202.118	0.392688	0.376736	N
Pg_S8582.1	FLA9	AT1G03870	44403	-0.692	-0.59	Yes	690.541	597.957	664.14	829.83	816.269	933.891	0.401941	0.237197	N
Pg_S2763.11	WAT1	AT1G75500	44434	-0.694	-0.584	Yes	1.07394	1.84555	5.70567	5.20596	6.29976	4.51155	0.893006	0.755241	N
Pg_S4209.8	GUT1	AT5G61840	44435	-0.694	-0.5774	Yes	302.85	282.369	292.13	385.241	356.386	418.672	0.403274	0.257815	N
Pg_S0633.8	CESA3, IXR1, ATCESA3, ATHB, CEV1	AT5G05170	44536	-0.7	-0.5726	Yes	3139.12	3227.86	3069.65	4213.7	4227.14	4068.52	0.406664	0.355704	N
Pg_S8978.2	IRX14L, I14H	AT5G67230	44582	-0.703	-0.5668	Yes	400.578	371.878	405.103	537.255	545.379	480.029	0.408208	0.229559	N
Pg_S0516.29	GXM1	AT1G09610	44745	-0.715	-0.563	Yes	168.608	211.315	181.44	251.968	216.892	279.716	0.415214	0.302467	N
Pg_S5690.6	IRX3, CESA7, ATCESA7, MUR10	AT5G17420	44914	-0.725	-0.5593	Yes	26.8484	15.6872	9.12907	29.1534	29.6989	24.3624	0.68766	0.482886	N
Pg_S0358.14	IRX14L, I14H	AT5G67230	45034	-0.734	-0.5546	Yes	405.948	382.951	365.163	517.472	546.279	487.248	0.426477	0.20897	N
Pg_S3044.3	FLA7	AT2G04780	45224	-0.748	-0.5511	Yes	394.135	402.329	410.808	550.791	567.878	513.415	0.434964	0.19291	N
Pg_S5246.7	RWA2	AT3G06550	45338	-0.756	-0.546	Yes	590.665	633.023	540.898	826.707	747.871	818.396	0.439475	0.196349	N
Pg_S1066.12	CESA4, IRX5, NWS2	AT5G44030	45624	-0.774	-0.5441	Yes	2.14787	0	4.56454	4.16477	7.19972	4.51155	1.24195	0.533152	N
Pg_S0032.13	IRX9L, I9H	AT1G27600	45744	-0.783	-0.5389	Yes	168.608	163.331	209.969	266.545	246.591	230.089	0.455752	0.228152	N
Pg_S2503.14	IRX12, LAC4, ATLMCO4, LMCO4	AT2G38080	45907	-0.796	-0.5344	Yes	0	0.922774	0	0	3.59986	7.21848	3.55136	0.304664	N
Pg_S3394.10	RWA2	AT3G06550	46197	-0.817	-0.5321	Yes	1354.23	1419.23	1259.81	1846.03	1906.13	1856.05	0.47559	0.174896	N
Pg_S0640.1	TBL33	AT2G40320	46290	-0.823	-0.526	Yes	3.22181	4.61387	2.28227	3.12358	11.6996	9.02311	1.23684	0.535262	N
Pg_S0327.9	COBL4, IRX6	AT5G15630	47015	-0.877	-0.5314	Yes	6.44362	9.22774	1.14113	15.6179	11.6996	9.02311	1.11205	0.501942	N
Pg_S7106.2	ATMYB52, BW52, MYB52	AT1G17950	47168	-0.889	-0.5259	Yes	2.14787	7.38219	0	6.24715	8.99966	11.73	1.50116	0.471289	N
Pg_S0872.13	CESA3, IXR1, ATCESA3, ATHB, CEV1	AT5G05170	47453	-0.917	-0.5225	Yes	2085.58	2077.16	2145.33	3012.17	3110.28	3017.33	0.534958	0.132697	N
Pg_S3009.10	RWA2	AT3G06550	47566	-0.928	-0.5158	Yes	867.741	963.376	886.661	1267.13	1342.75	1346.25	0.541661	0.0861931	N
Pg_S4430.14	ATKINESIN13A, KINESIN13A	AT3G16630	47948	-0.968	-0.5139	Yes	231.97	288.828	312.671	421.683	428.384	383.482	0.565613	0.0720152	N
Pg_S6148.5	PXC1	AT2G36570	48067	-0.978	-0.5068	Yes	538.042	577.656	473.571	805.883	778.47	777.792	0.571734	0.0636295	N
Pg_S1700.3	CESA8, IRX1, ATCESA8, LEW2	AT4G18780	48240	-0.994	-0.5006	Yes	10.7394	5.53664	9.12907	16.6591	15.2994	36.0924	1.4215	0.0799209	N
Pg_S1357.8	TBL33	AT2G40320	48341	-1.006	-0.4929	Yes	106.32	35.0654	81.0205	130.149	125.095	159.709	0.899755	0.0172431	Y
Pg_S6520.6	MYB26	AT3G13890	48483	-1.024	-0.4858	Yes	0	3.6911	0	30.1946	10.7996	7.21848	3.70729	0.0119097	Y
Pg_S3663.2	IRX3, CESA7, ATCESA7, MUR10	AT5G17420	48502	-1.027	-0.4764	Yes	11.8133	20.301	31.9518	49.9772	45.8982	30.6786	0.982121	0.144016	N
Pg_S3717.6	MYB26	AT3G13890	48545	-1.032	-0.4674	Yes	1.07394	0.922774	0	2.08238	4.49983	1.80462	2.0705	0.632719	N
Pg_S1777.6	PGSIP2, GUX3	AT1G77130	48699	-1.055	-0.4602	Yes	216.935	220.543	205.404	381.076	320.388	285.13	0.617902	0.0640301	N
Pg_S3083.7	IRX15-L	AT5G67210	49611	-1.194	-0.4662	Yes	787.196	677.316	722.338	1188	1199.65	1171.2	0.702559	0.0117713	N
Pg_S6606.7	CESA4, IRX5, NWS2	AT5G44030	49692	-1.208	-0.4562	Yes	52.6229	47.0615	62.7624	81.213	82.7968	101.961	0.711302	0.154416	N
Pg_S0898.12	COBL4, IRX6	AT5G15630	49744	-1.218	-0.4456	Yes	6.44362	7.38219	25.105	30.1946	35.0987	36.9947	1.39365	0.0412085	Y
Pg_S3779.5	IRX9L, I9H	AT1G27600	50160	-1.323	-0.4409	Yes	67.658	60.9031	87.8673	127.025	121.495	123.617	0.781945	0.0599784	N
Pg_S4176.15	FLA7	AT2G04780	50248	-1.343	-0.4297	Yes	195.456	260.222	262.461	384.2	432.883	428.597	0.794598	0.00515186	Y
Pg_S3636.15	COBL4, IRX6	AT5G15630	50329	-1.364	-0.4183	Yes	1.07394	1.84555	4.56454	13.5355	9.89962	6.31617	1.99107	0.201936	N
Pg_S2357.5	GXM1	AT1G09610	50524	-1.422	-0.4084	Yes	269.558	255.608	200.84	408.147	488.681	406.04	0.843638	0.00250216	Y
Pg_S6185.12	RWA3	AT2G34410	50526	-1.423	-0.3949	Yes	121.355	137.493	128.948	251.968	221.392	222.871	0.844266	0.0116733	Y
Pg_S5731.13	IRX15-L	AT5G67210	50536	-1.425	-0.3815	Yes	82.6931	131.957	111.831	201.991	197.992	204.824	0.889479	0.0116558	Y
Pg_S3078.2	PGSIP3, GUX2	AT4G33330	50927	-1.565	-0.374	Yes	40.8096	46.1387	21.6815	87.4601	80.0969	78.501	1.17958	0.019632	Y
Pg_S7142.3	COBL4, IRX6	AT5G15630	50985	-1.589	-0.3599	Yes	3.22181	14.7644	11.4113	51.0184	70.1973	30.6786	2.3693	0.000146732	Y
Pg_S5113.5	ATMYB52, BW52, MYB52	AT1G17950	51241	-1.694	-0.3487	Yes	8.59149	2.76832	0	16.6591	17.0993	17.1439	2.16379	0.0745902	N
Pg_S0259.3	IRX12, LAC4, ATLMCO4, LMCO4	AT2G38080	51259	-1.702	-0.3328	Yes	5.36968	10.1505	6.8468	18.7415	28.7989	18.0462	1.55203	0.0896081	N
Pg_S0319.4	IRX9L, I9H	AT1G27600	51571	-1.858	-0.321	Yes	88.0628	71.9764	85.5851	186.373	170.093	179.56	1.12585	0.00115897	Y
Pg_S5455.5	IRX12, LAC4, ATLMCO4, LMCO4	AT2G38080	51725	-1.957	-0.3053	Yes	52.6229	47.0615	69.6092	117.655	147.594	126.323	1.20975	0.000742062	Y
Pg_S0108.14	PGSIP3, GUX2	AT4G33330	51899	-2.136	-0.2882	Yes	15.0351	3.6911	27.3872	57.2656	82.7968	73.0872	2.20861	6.89485e-06	Y
Pg_S0932.1	SMB	AT1G79580	52119	-2.351	-0.27	Yes	3.22181	0.922774	2.28227	15.6179	19.7992	10.8277	2.84711	0.0177126	Y
Pg_S0076.9	IRX12, LAC4, ATLMCO4, LMCO4	AT2G38080	52250	-2.503	-0.2486	Yes	24.7005	14.7644	18.2581	62.4715	69.2973	59.5525	1.72878	0.00226387	Y
Pg_S3075.11	GXM1	AT1G09610	52306	-2.587	-0.225	Yes	11.8133	11.0733	11.4113	31.2358	38.6985	37.897	1.65258	0.0190101	Y
Pg_S1033.40	TBL33	AT2G40320	52360	-2.7	-0.2003	Yes	50.475	48.907	38.7986	163.467	163.794	135.347	1.74323	1.7214e-06	Y
Pg_S2111.9	PGSIP3, GUX2	AT4G33330	52371	-2.723	-0.1746	Yes	39.7357	56.2892	37.6574	153.055	136.795	186.778	1.83406	2.52879e-07	Y
Pg_S2973.1	IRX15L	AT5G67210	52442	-2.886	-0.1484	Yes	63.3623	54.4437	66.1858	244.68	215.092	226.48	1.8991	2.03399e-09	Y
Pg_S4042.1	IRX12, LAC4, ATLMCO4, LMCO4	AT2G38080	52501	-3.037	-0.1206	Yes	7.51756	15.6872	5.70567	78.0894	65.6975	53.2363	2.76871	2.16788e-06	Y
Pg_S1106.50	IRX15L	AT5G67210	52514	-3.104	-0.0912	Yes	229.822	216.852	209.969	988.091	922.465	895.994	2.09562	1.17148e-18	Y
Pg_S4640.1	NST1, ANAC043	AT2G46770	52534	-3.185	-0.0613	Yes	1.07394	12.9188	6.8468	79.1306	74.6971	59.5525	3.35603	1.79984e-08	Y
Pg_S3734.3	IRX9L, I9H	AT1G27600	52549	-3.252	-0.0306	Yes	234.118	217.775	207.686	1016.2	1094.36	1002.47	2.2387	2.7391e-21	Y
Pg_S6366.1	NST1, ANAC043	AT2G46770	52583	-3.452	0.0017	Yes	13.9612	8.30496	6.8468	65.5951	76.4971	77.5987	2.91574	2.04838e-07	Y

## Sheet: Table S3
Supplementary Table S3. GA-responsive elements (GARE) in the selected DEGs
motif_id	motif_alt_id	sequence_name	start	stop	strand	score	p-value	matched_sequence
GARE	TAACAAR	Pg_S6185.12	75	81	+	11.9333	7.93e-05	TAACAAG
GARE	TAACAAR	Pg_S3394.10	362	368	+	11.9333	7.93e-05	TAACAAG
GARE	TAACAAR	Pg_S4176.15	489	495	+	11.9333	7.93e-05	TAACAAG
GARE	TAACAAR	Pg_S3044.3	492	498	+	11.9333	7.93e-05	TAACAAG
GARE	TAACAAR	Pg_S3636.15	652	658	+	11.9333	7.93e-05	TAACAAG
GARE	TAACAAR	Pg_S0327.9	653	659	+	11.9333	7.93e-05	TAACAAG
GARE	TAACAAR	Pg_S2357.5	806	812	+	11.9333	7.93e-05	TAACAAG
GARE	TAACAAR	Pg_S0516.29	807	813	+	11.9333	7.93e-05	TAACAAG
GARE	TAACAAR	Pg_S5455.5	961	967	+	11.9333	7.93e-05	TAACAAG
GARE	TAACAAR	Pg_S6366.1	514	520	-	11.9333	7.93e-05	TAACAAG
GARE	TAACAAR	Pg_S8978.2	552	558	-	11.9333	7.93e-05	TAACAAG
GARE	TAACAAR	Pg_S0108.14	664	670	-	11.9333	7.93e-05	TAACAAG
GARE	TAACAAR	Pg_S2111.9	977	983	-	11.9333	7.93e-05	TAACAAG
GARE	TAACAAR	Pg_S2973.1	36	42	+	11.6667	0.000176	TAACAAA
GARE	TAACAAR	Pg_S1066.12	185	191	+	11.6667	0.000176	TAACAAA
GARE	TAACAAR	Pg_S5690.6	233	239	+	11.6667	0.000176	TAACAAA
GARE	TAACAAR	Pg_S6185.12	248	254	+	11.6667	0.000176	TAACAAA
GARE	TAACAAR	Pg_S0032.13	293	299	+	11.6667	0.000176	TAACAAA
GARE	TAACAAR	Pg_S5455.5	311	317	+	11.6667	0.000176	TAACAAA
GARE	TAACAAR	Pg_S4209.8	316	322	+	11.6667	0.000176	TAACAAA
GARE	TAACAAR	Pg_S5690.6	322	328	+	11.6667	0.000176	TAACAAA
GARE	TAACAAR	Pg_S4430.14	409	415	+	11.6667	0.000176	TAACAAA
GARE	TAACAAR	Pg_S3009.10	508	514	+	11.6667	0.000176	TAACAAA
GARE	TAACAAR	Pg_S6520.6	774	780	+	11.6667	0.000176	TAACAAA
GARE	TAACAAR	Pg_S0032.13	906	912	+	11.6667	0.000176	TAACAAA
GARE	TAACAAR	Pg_S4209.8	987	993	+	11.6667	0.000176	TAACAAA
GARE	TAACAAR	Pg_S0259.3	93	99	-	11.6667	0.000176	TAACAAA
GARE	TAACAAR	Pg_S4209.8	226	232	-	11.6667	0.000176	TAACAAA
GARE	TAACAAR	Pg_S3078.2	663	669	-	11.6667	0.000176	TAACAAA
GARE	TAACAAR	Pg_S4176.15	758	764	-	11.6667	0.000176	TAACAAA
GARE	TAACAAR	Pg_S3044.3	764	770	-	11.6667	0.000176	TAACAAA
GARE	TAACAAR	Pg_S6185.12	809	815	-	11.6667	0.000176	TAACAAA
GARE	TAACAAR	Pg_S2973.1	870	876	-	11.6667	0.000176	TAACAAA

## Sheet: Table S4
Supplementary Table S4. Gene list within transcriptional network related to cell wall biogenesis in GA-induced P. ginseng root
GO term	Gene ID	Gene in network	Gene name	Homologous TAIR gene ID (v10)	Gene name in STRING database	Expression value (TPM)
						DMSO-1	DMSO-2	DMSO-3	GA-1	GA-2	GA-3
Plant-type cell wall organization or biogenesis	Pg_S1357.8	Y	TBL33	AT2G40320	TBL33	106.32	35.0654	81.0205	130.149	125.095	159.709
	Pg_S5010.7	Y		AT2G41770	AT2G41770	870.963	831.419	882.097	1289	1269.85	1343.54
	Pg_S6520.6	Y	MYB26	AT3G13890	MYB26	0	3.6911	0	30.1946	10.7996	7.21848
	Pg_S4097.3	Y	RGP3, RGP	AT3G08900	RGP3	427.427	454.005	448.466	659.075	698.373	661.394
	Pg_S5603.9	Y		AT2G41770	AT2G41770	596.035	623.795	607.083	953.732	889.166	932.989
	Pg_S1717.12	Y	FEI1	AT1G31420	FEI1	358.695	331.276	341.199	558.079	536.379	513.415
	Pg_S1428.11	Y		AT3G57280	AT3G57280	705.576	760.366	766.842	1145.31	1268.95	1167.59
	Pg_S1305.19	Y	UGD3	AT5G15490	UGD3	161.09	169.79	195.134	313.399	292.489	249.94
	Pg_S3083.7	Y	IRX15-L	AT5G67210	IRX15-L	787.196	677.316	722.338	1188	1199.65	1171.2
	Pg_S0898.12	Y	COBL4, IRX6	AT5G15630	IRX6	6.44362	7.38219	25.105	30.1946	35.0987	36.9947
	Pg_S8336.1	Y	FEI1	AT1G31420	FEI1	535.894	570.274	610.507	975.597	935.964	1005.17
	Pg_S3934.3	Y		AT3G57280	AT3G57280	393.061	399.561	423.361	710.093	687.574	681.244
	Pg_S1642.9	Y	RIC4	AT5G16490	RIC4	0	0	3.4234	21.865	8.09969	10.8277
	Pg_S0684.12	Y	CESA6, IXR2, E112, PRC1	AT5G64740	CESA6	3218.59	3130.97	3270.49	5656.8	5670.68	5502.29
	Pg_S0590.1	Y	CESA1, RSW1, AtCESA1	AT4G32410	CESA1	1791.33	1737.58	1969.6	3292.25	3373.97	2997.48
	Pg_S6185.12	Y	RWA3	AT2G34410	RWA3	121.355	137.493	128.948	251.968	221.392	222.871
	Pg_S5731.13	Y	IRX15-L	AT5G67210	IRX15-L	82.6931	131.957	111.831	201.991	197.992	204.824
	Pg_S3554.24	Y	ATEXPB3, EXPB3, ATHEXP BETA 1.6	AT4G28250	EXPB3	927.881	953.225	880.956	1679.44	1642.44	1682.81
	Pg_S6252.2	Y	ATEXLB1, EXPR, ATEXPR, ATEXPR1, ATHEXP BETA 3.1, EXLB1	AT4G17030	EXLB1	1.07394	0	1.14113	34.3593	63.8976	15.3393
	Pg_S1993.32	Y	CESA6, IXR2, E112, PRC1	AT5G64740	CESA6	4163.65	4293.67	4454.99	7977.61	8128.49	8174.93
	Pg_S3078.2	Y	PGSIP3, GUX2	AT4G33330	PGSIP3	40.8096	46.1387	21.6815	87.4601	80.0969	78.501
	Pg_S7142.3	Y	COBL4, IRX6	AT5G15630	IRX6	3.22181	14.7644	11.4113	51.0184	70.1973	30.6786
	Pg_S1941.29	Y	UGD2	AT3G29360	UGD2	54.7708	46.1387	60.4801	116.614	88.1966	110.984
	Pg_S2784.11	Y	ATAO1, AO1	AT4G14940	dl3510w	95.5804	89.5091	116.396	218.65	188.093	200.313
	Pg_S5781.7	Y	CESA1, RSW1, AtCESA1	AT4G32410	CESA1	2779.35	2773.86	2850.55	5620.36	5687.78	5678.24
	Pg_S5196.2	Y	RCI3, RCI3A	AT1G05260	RCI3	233.044	272.218	199.698	423.765	564.278	502.587
	Pg_S0319.4	Y	IRX9L, I9H	AT1G27600	IRX9-L	88.0628	71.9764	85.5851	186.373	170.093	179.56
	Pg_S1035.9	Y	CESA9, CESA09	AT2G21770	CESA9	1248.99	1316.8	1276.93	2810.18	2826.79	2781.82
	Pg_S2290.6	Y	CESA6, IXR2, E112, PRC1	AT5G64740	CESA6	1491.7	1594.55	1601.01	3433.85	3497.27	3428.78
	Pg_S3610.1	Y		AT3G01190	AT3G01190	75.1756	81.2041	89.0085	214.486	161.094	166.927
	Pg_S1514.19	Y		AT1G76670	AT1G76670	60.1405	49.8298	36.5163	130.149	100.796	115.496
	Pg_S5455.5	Y	IRX12, LAC4, ATLMCO4, LMCO4	AT2G38080	IRX12	52.6229	47.0615	69.6092	117.655	147.594	126.323
	Pg_S2307.28	Y	COB	AT5G60920	At5g60920	1415.45	1609.32	1411.58	3276.63	3488.27	3394.49
	Pg_S0981.31	Y	UGD3	AT5G15490	UGD3	362.991	366.341	457.595	893.343	904.465	931.184
	Pg_S0219.46	Y	UGD2	AT3G29360	UGD2	38.6617	28.606	44.5042	92.6661	77.397	97.4495
	Pg_S1189.4	Y	CESA6, IXR2, E112, PRC1	AT5G64740	CESA6	1818.17	1812.33	1805.27	4245.98	4326.13	4201.16
	Pg_S0001.1	Y	CESA6, IXR2, E112, PRC1	AT5G64740	CESA6	1188.85	1195.91	1291.76	2806.01	2865.49	3014.62
	Pg_S0108.14	Y	PGSIP3, GUX2	AT4G33330	PGSIP3	15.0351	3.6911	27.3872	57.2656	82.7968	73.0872
	Pg_S2472.24	Y	XTH33, XET	AT1G10550	XTH33	23.6266	25.8377	13.6936	53.1008	62.0976	67.6733
	Pg_S0399.30	Y	ATEXLB1, EXPR, ATEXPR, ATEXPR1, ATHEXP BETA 3.1, EXLB1	AT4G17030	EXLB1	169.682	156.872	115.255	467.495	409.484	300.469
	Pg_S0493.46	Y	ROPGAP3	AT2G46710	ROPGAP3	153.573	139.339	156.335	400.859	371.686	411.454
	Pg_S1562.3	Y	ROPGAP3	AT2G46710	ROPGAP3	218.009	248.226	233.932	634.086	653.375	575.674
	Pg_S0159.54	Y	ANL2, AHDP	AT4G00730	ANL2	10.7394	13.8416	15.9759	46.8536	59.3977	83.0126
	Pg_S0076.9	Y	IRX12, LAC4, ATLMCO4, LMCO4	AT2G38080	IRX12	24.7005	14.7644	18.2581	62.4715	69.2973	59.5525
	Pg_S1698.5	Y	ATAO1, AO1	AT4G14940	dl3510w	115.985	105.196	115.255	301.946	394.185	329.343
	Pg_S0681.9	Y	RGP1, ATRGP1	AT3G02230	RGP1	222.305	255.608	289.848	794.43	806.369	863.511
	Pg_S1033.40	Y	TBL33	AT2G40320	TBL33	50.475	48.907	38.7986	163.467	163.794	135.347
	Pg_S2111.9	Y	PGSIP3, GUX2	AT4G33330	PGSIP3	39.7357	56.2892	37.6574	153.055	136.795	186.778
	Pg_S1865.16	Y	RWP1	AT5G41040	RWP1	133.168	132.879	127.807	387.323	482.382	485.443
	Pg_S2973.1	Y	IRX15-L	AT5G67210	IRX15-L	63.3623	54.4437	66.1858	244.68	215.092	226.48
	Pg_S7457.4	Y	RWP1	AT5G41040	RWP1	128.872	92.2774	95.8553	397.735	422.084	410.551
	Pg_S4042.1	Y	IRX12, LAC4, ATLMCO4, LMCO4	AT2G38080	IRX12	7.51756	15.6872	5.70567	78.0894	65.6975	53.2363
	Pg_S1106.50	Y	IRX15-L	AT5G67210	IRX15-L	229.822	216.852	209.969	988.091	922.465	895.994
	Pg_S4640.1	Y	NST1, ANAC043	AT2G46770	NST1	1.07394	12.9188	6.8468	79.1306	74.6971	59.5525
	Pg_S3734.3	Y	IRX9L, I9H	AT1G27600	IRX9-L	234.118	217.775	207.686	1016.2	1094.36	1002.47
	Pg_S2307.10	Y	RGP1, ATRGP1	AT3G02230	RGP1	158.943	180.864	178.017	868.354	978.263	877.046
	Pg_S6366.1	Y	NST1, ANAC043	AT2G46770	NST1	13.9612	8.30496	6.8468	65.5951	76.4971	77.5987
Cell cycle/Cell division	Pg_S0265.15	Y	RANGAP1	AT3G63130	RANGAP1	471.458	449.391	490.688	728.834	765.871	675.831
	Pg_S1583.41	Y	POK1	AT3G17360	POK1	242.71	280.523	243.062	409.189	392.385	387.091
	Pg_S2010.25	Y	TCP15	AT1G69690	TCP15	278.15	367.264	332.07	531.008	515.68	494.466
	Pg_S2758.7	Y	MCM2, ATMCM2	AT1G44900	MCM2	364.065	309.129	374.292	555.997	544.479	553.116
	Pg_S0265.16	Y	CYCP1;1	AT3G63120	CYCP1;1	181.495	186.4	184.864	270.71	298.789	304.981
	Pg_S0978.42	Y	CDC20.1	AT4G33270	CDC20.1	216.935	198.396	197.416	313.399	324.888	332.05
	Pg_S5054.8	Y	CYC1BAT, CYCB1;2	AT5G06150	CYC1BAT	200.826	219.62	230.509	351.923	324.888	354.608
	Pg_S0428.46	Y	CDC48C	AT5G03340	AtCDC48C	1538.95	1537.34	1389.9	2376	2345.31	2372.17
	Pg_S3047.1	Y	CMT3	AT1G69770	CMT3	175.052	161.485	187.146	314.44	276.289	247.233
	Pg_S0756.11	Y	CDC2B, CDKB1;1	AT3G54180	CDKB1;1	141.76	140.262	173.452	246.763	246.591	240.015
	Pg_S3358.6	Y	TPX2	AT1G03780	At1g03780	89.1367	97.814	136.936	196.785	162.894	181.364
	Pg_S2456.22	Y	CYC1BAT, CYCB1;2	AT5G06150	CYC1BAT	228.749	215.929	230.509	361.294	404.984	332.05
	Pg_S1205.7	Y	CYCB2;3	AT1G20610	CYCB2;3	103.098	125.497	123.242	152.014	225.891	194.899
	Pg_S8721.1	Y	MCM4	AT2G16440	MCM4	239.488	220.543	166.606	338.387	335.687	346.487
	Pg_S0032.10	Y	CYCD3;1, CYCD3	AT4G34160	CYCD3;1	25.7745	60.9031	35.3752	74.9658	80.9969	118.203
	Pg_S5401.5	Y	MCM2, ATMCM2	AT1G44900	MCM2	423.131	393.102	427.925	680.94	680.374	711.923
	Pg_S1536.5	Y	CMT3	AT1G69770	CMT3	280.297	321.125	322.941	531.008	499.481	520.633
	Pg_S5800.2	Y	SHR, SGR7	AT4G37650	SHR	193.309	184.555	208.828	307.152	317.688	361.827
	Pg_S1286.4	Y		AT2G30060	AT2G30060	1556.13	1642.54	1434.41	2582.16	2559.5	2690.69
	Pg_S4434.2	Y	UBC19	AT3G20060	UBC19	139.612	129.188	123.242	225.939	215.992	221.066
	Pg_S6388.5	Y	EMB2795	AT2G32590	EMB2795	114.911	107.965	122.101	209.28	182.693	201.215
	Pg_S0199.27	Y	TPX2	AT1G03780	At1g03780	123.503	166.099	118.678	212.403	248.39	244.526
	Pg_S0684.12	Y	CESA6, IXR2, E112, PRC1	AT5G64740	CESA6	3218.59	3130.97	3270.49	5656.8	5670.68	5502.29
	Pg_S0330.6	Y	UBC19	AT3G20060	UBC19	11.8133	28.606	14.8347	35.4005	44.9983	57.7479
	Pg_S0590.1	Y	CESA1, RSW1, AtCESA1	AT4G32410	CESA1	1791.33	1737.58	1969.6	3292.25	3373.97	2997.48
	Pg_S8322.1	Y	CYCA3;3	AT1G47220	CYCA3;3	63.3623	74.7447	69.6092	106.202	130.495	130.835
	Pg_S0959.10	Y	FAS1	AT1G65470	FAS1	32.2181	23.9921	29.6695	60.3891	83.6968	46.0178
	Pg_S0266.10	Y	ETG1	AT2G40550	ETG1	96.6543	121.806	120.96	221.774	193.493	191.29
	Pg_S3911.5	Y	PPK1	AT1G77720	PPK1	106.32	100.582	131.23	186.373	229.491	195.801
	Pg_S5576.6	Y	CMT3	AT1G69770	CMT3	347.955	350.654	394.832	589.315	670.474	722.751
	Pg_S1468.1	Y	CYCA3;4	AT1G47230	CYCA3;4	6.44362	15.6872	5.70567	21.865	36.8986	45.1155
	Pg_S2299.2	Y	FBL17	AT3G54650	FBL17	59.0665	63.6714	38.7986	122.861	89.0966	99.2542
	Pg_S3165.2	Y		AT4G02110	AT4G02110	61.2144	59.9803	51.351	98.9133	103.496	115.496
	Pg_S0358.17	Y	CYCD3;2	AT5G67260	CYCD3;2	79.4713	73.8219	74.1737	149.932	140.395	131.737
	Pg_S1993.32	Y	CESA6, IXR2, E112, PRC1	AT5G64740	CESA6	4163.65	4293.67	4454.99	7977.61	8128.49	8174.93
	Pg_S1212.25	Y		AT3G02820	AT3G02820	9.66543	13.8416	21.6815	34.3593	31.4988	47.8225
	Pg_S0822.1	Y	MCM3	AT5G46280	MCM3	144.981	189.169	164.323	332.14	320.388	293.251
	Pg_S2848.12	Y	ATCDT1A, CDT1A, CDT1	AT2G31270	CDT1A	193.309	210.392	236.215	381.076	431.083	438.523
	Pg_S1590.22	Y	FBL17	AT3G54650	FBL17	32.2181	49.8298	52.4922	91.6249	95.3963	92.938
	Pg_S1530.21	Y	AtRFC1, RFC1	AT5G22010	RFC1	565.965	608.108	587.684	1285.87	1107.86	1094.5
	Pg_S4917.12	Y	CDC45	AT3G25100	CDC45	24.7005	13.8416	7.98794	39.5653	48.5981	45.1155
	Pg_S2678.2	Y	CYCA2;1	AT5G25380	CYCA2;1	49.4011	71.9764	57.0567	107.243	119.695	129.933
	Pg_S5781.7	Y	CESA1, RSW1, AtCESA1	AT4G32410	CESA1	2779.35	2773.86	2850.55	5620.36	5687.78	5678.24
	Pg_S1093.5	Y	MET1, MET2, METI, DDM2, DMT01, DMT1	AT5G49160	MET1	108.468	128.266	160.9	320.687	233.991	260.768
	Pg_S4994.8	Y	APD1	AT2G38185	APD1	84.841	95.0457	96.9964	186.373	191.693	190.388
	Pg_S4204.4	Y	JASON	AT1G06660	JASON	37.5878	44.2931	13.6936	85.3778	103.496	93.8403
	Pg_S0248.3	Y	ATMAP651, MAP651	AT5G55230	MAP65-1	11.8133	26.7604	12.5525	74.9658	45.8982	55.0409
	Pg_S2003.6	Y	AHP2	AT1G13330	HOP2	18.2569	31.3743	14.8347	58.3068	62.0976	55.0409
	Pg_S7026.9	Y	CYCD3;2	AT5G67260	CYCD3;2	26.8484	46.1387	29.6695	84.3366	86.3967	79.4033
	Pg_S0762.13	Y	ETG1	AT2G40550	ETG1	278.15	239.921	325.223	585.15	622.776	607.255
	Pg_S1242.7	Y		AT5G15510	AT5G15510	45.1053	38.7565	38.7986	105.16	72.8972	86.6218
	Pg_S0248.2	Y	MAP655	AT2G38720	MAP65-5	10.7394	3.6911	7.98794	21.865	41.3984	32.4832
	Pg_S1613.11	Y	MCM3	AT5G46280	MCM3	142.834	146.721	176.876	320.687	377.986	313.102
	Pg_S1035.9	Y	CESA9, CESA09	AT2G21770	CESA9	1248.99	1316.8	1276.93	2810.18	2826.79	2781.82
	Pg_S2290.6	Y	CESA6, IXR2, E112, PRC1	AT5G64740	CESA6	1491.7	1594.55	1601.01	3433.85	3497.27	3428.78
	Pg_S1514.19	Y		AT1G76670	AT1G76670	60.1405	49.8298	36.5163	130.149	100.796	115.496
	Pg_S1189.4	Y	CESA6, IXR2, E112, PRC1	AT5G64740	CESA6	1818.17	1812.33	1805.27	4245.98	4326.13	4201.16
	Pg_S0001.1	Y	CESA6, IXR2, E112, PRC1	AT5G64740	CESA6	1188.85	1195.91	1291.76	2806.01	2865.49	3014.62
	Pg_S1934.3	Y	SYN3, ATRAD21.2, ATSYN3	AT3G59550	SYN3	18.2569	11.0733	11.4113	30.1946	44.0983	36.0924
	Pg_S4969.4	Y	cycp3;1	AT2G45080	cycp3;1	20.4048	13.8416	28.5284	64.5539	65.6975	51.4317
	Pg_S0373.10	Y	FAS1, NFB2	AT1G65470	FAS1	52.6229	48.907	50.2099	125.984	106.196	128.128
	Pg_S1292.3	Y		AT4G15890	AT4G15890	10.7394	4.61387	11.4113	26.0298	30.5988	32.4832
	Pg_S2409.5	Y	UBC19	AT3G20060	UBC19	57.9926	85.818	114.113	242.598	251.99	277.009
	Pg_S1444.2	Y	CYCP4;1	AT2G44740	CYCP4;1	37.5878	31.3743	51.351	120.778	112.496	94.7426
	Pg_S0662.68	Y	CER4, G7, FAR3	AT4G33790	CER4	403.8	448.468	382.28	1155.72	1197.85	1017.81
	Pg_S0967.14	Y	SHR, SGR7	AT4G37650	SHR	18.2569	6.45942	9.12907	58.3068	48.5981	38.7994
	Pg_S4488.1	Y	HIK, ATNACK1, NACK1	AT1G18370	HIK	0	0	0	12.4943	22.4991	29.7762
	Pg_S5204.2	Y	ATPS1, PS1	AT1G34355	At1g34355	38.6617	29.5288	46.7865	112.449	147.594	122.714
	Pg_S4464.14	Y	CYCP4;1	AT2G44740	CYCP4;1	6.44362	2.76832	14.8347	60.3891	93.5964	73.0872
	Pg_S1307.9	Y	cycp3;1	AT2G45080	cycp3;1	21.4787	26.7604	17.117	96.8309	92.6965	80.3056
	Pg_S3170.1	Y	EMB2780	AT5G63960	EMB2780	5.36968	4.61387	6.8468	22.9062	26.999	18.0462
	Pg_S0265.15	Y	RANGAP1	AT3G63130	RANGAP1	471.458	449.391	490.688	728.834	765.871	675.831
	Pg_S1583.41	Y	POK1	AT3G17360	POK1	242.71	280.523	243.062	409.189	392.385	387.091
	Pg_S0265.16	Y	CYCP1;1	AT3G63120	CYCP1;1	181.495	186.4	184.864	270.71	298.789	304.981
	Pg_S0978.42	Y	CDC20.1	AT4G33270	CDC20.1	216.935	198.396	197.416	313.399	324.888	332.05
	Pg_S5054.8	Y	CYC1BAT, CYCB1;2	AT5G06150	CYC1BAT	200.826	219.62	230.509	351.923	324.888	354.608
	Pg_S0428.46	Y	CDC48C	AT5G03340	AtCDC48C	1538.95	1537.34	1389.9	2376	2345.31	2372.17
	Pg_S3047.1	Y	CMT3	AT1G69770	CMT3	175.052	161.485	187.146	314.44	276.289	247.233
	Pg_S0756.11	Y	CDC2B, CDKB1;1	AT3G54180	CDKB1;1	141.76	140.262	173.452	246.763	246.591	240.015
	Pg_S3358.6	Y	TPX2	AT1G03780	At1g03780	89.1367	97.814	136.936	196.785	162.894	181.364
	Pg_S2456.22	Y	CYC1BAT, CYCB1;2	AT5G06150	CYC1BAT	228.749	215.929	230.509	361.294	404.984	332.05
	Pg_S1205.7	Y	CYCB2;3	AT1G20610	CYCB2;3	103.098	125.497	123.242	152.014	225.891	194.899
	Pg_S3312.1	Y	VIM1, ORTH2	AT1G57820	VIM1	1.07394	0	0	15.6179	5.39979	4.51155
	Pg_S0032.10	Y	CYCD3;1, CYCD3	AT4G34160	CYCD3;1	25.7745	60.9031	35.3752	74.9658	80.9969	118.203
	Pg_S1536.5	Y	CMT3	AT1G69770	CMT3	280.297	321.125	322.941	531.008	499.481	520.633
	Pg_S5800.2	Y	SHR, SGR7	AT4G37650	SHR	193.309	184.555	208.828	307.152	317.688	361.827
	Pg_S2827.3	Y	ARF16	AT4G30080	ARF16	172.904	159.64	133.513	249.886	268.19	277.009
	Pg_S6388.5	Y	EMB2795	AT2G32590	EMB2795	114.911	107.965	122.101	209.28	182.693	201.215
	Pg_S4313.9	Y	ACT7	AT5G09810	ACT7	2654.77	2685.27	2658.84	4531.27	4673.52	4606.3
	Pg_S0199.27	Y	TPX2	AT1G03780	At1g03780	123.503	166.099	118.678	212.403	248.39	244.526
	Pg_S0684.12	Y	CESA6, IXR2, E112, PRC1	AT5G64740	CESA6	3218.59	3130.97	3270.49	5656.8	5670.68	5502.29
	Pg_S0590.1	Y	CESA1, RSW1, AtCESA1	AT4G32410	CESA1	1791.33	1737.58	1969.6	3292.25	3373.97	2997.48
	Pg_S8322.1	Y	CYCA3;3	AT1G47220	CYCA3;3	63.3623	74.7447	69.6092	106.202	130.495	130.835
	Pg_S0266.10	Y	ETG1	AT2G40550	ETG1	96.6543	121.806	120.96	221.774	193.493	191.29
	Pg_S0606.2	Y	ATHSFB4, HSFB4, SCZ	AT1G46264	HSFB4	79.4713	55.3664	50.2099	111.408	105.296	137.151
	Pg_S5576.6	Y	CMT3	AT1G69770	CMT3	347.955	350.654	394.832	589.315	670.474	722.751
	Pg_S1468.1	Y	CYCA3;4	AT1G47230	CYCA3;4	6.44362	15.6872	5.70567	21.865	36.8986	45.1155
	Pg_S0358.17	Y	CYCD3;2	AT5G67260	CYCD3;2	79.4713	73.8219	74.1737	149.932	140.395	131.737
	Pg_S1993.32	Y	CESA6, IXR2, E112, PRC1	AT5G64740	CESA6	4163.65	4293.67	4454.99	7977.61	8128.49	8174.93
	Pg_S4917.12	Y	CDC45	AT3G25100	CDC45	24.7005	13.8416	7.98794	39.5653	48.5981	45.1155
	Pg_S2678.2	Y	CYCA2;1	AT5G25380	CYCA2;1	49.4011	71.9764	57.0567	107.243	119.695	129.933
	Pg_S5781.7	Y	CESA1, RSW1, AtCESA1	AT4G32410	CESA1	2779.35	2773.86	2850.55	5620.36	5687.78	5678.24
	Pg_S1093.5	Y	MET1, MET2, METI, DDM2, DMT01, DMT1	AT5G49160	MET1	108.468	128.266	160.9	320.687	233.991	260.768
	Pg_S0248.3	Y	ATMAP651, MAP651	AT5G55230	MAP65-1	11.8133	26.7604	12.5525	74.9658	45.8982	55.0409
	Pg_S5168.4	Y	ATERF1, ERF1	AT4G17500	ERF-1	90.2107	129.188	102.702	240.515	242.991	202.118
	Pg_S7026.9	Y	CYCD3;2	AT5G67260	CYCD3;2	26.8484	46.1387	29.6695	84.3366	86.3967	79.4033
	Pg_S0762.13	Y	ETG1	AT2G40550	ETG1	278.15	239.921	325.223	585.15	622.776	607.255
	Pg_S0248.2	Y	MAP655	AT2G38720	MAP65-5	10.7394	3.6911	7.98794	21.865	41.3984	32.4832
	Pg_S1035.9	Y	CESA9, CESA09	AT2G21770	CESA9	1248.99	1316.8	1276.93	2810.18	2826.79	2781.82
	Pg_S2290.6	Y	CESA6, IXR2, E112, PRC1	AT5G64740	CESA6	1491.7	1594.55	1601.01	3433.85	3497.27	3428.78
	Pg_S1514.19	Y		AT1G76670	AT1G76670	60.1405	49.8298	36.5163	130.149	100.796	115.496
	Pg_S1189.4	Y	CESA6, IXR2, E112, PRC1	AT5G64740	CESA6	1818.17	1812.33	1805.27	4245.98	4326.13	4201.16
	Pg_S0001.1	Y	CESA6, IXR2, E112, PRC1	AT5G64740	CESA6	1188.85	1195.91	1291.76	2806.01	2865.49	3014.62
	Pg_S1934.3	Y	SYN3, ATRAD21.2, ATSYN3	AT3G59550	SYN3	18.2569	11.0733	11.4113	30.1946	44.0983	36.0924
	Pg_S4969.4	Y	cycp3;1	AT2G45080	cycp3;1	20.4048	13.8416	28.5284	64.5539	65.6975	51.4317
	Pg_S1444.2	Y	CYCP4;1	AT2G44740	CYCP4;1	37.5878	31.3743	51.351	120.778	112.496	94.7426
	Pg_S0967.14	Y	SHR, SGR7	AT4G37650	SHR	18.2569	6.45942	9.12907	58.3068	48.5981	38.7994
	Pg_S4488.1	Y	HIK, ATNACK1, NACK1	AT1G18370	HIK	0	0	0	12.4943	22.4991	29.7762
	Pg_S4464.14	Y	CYCP4;1	AT2G44740	CYCP4;1	6.44362	2.76832	14.8347	60.3891	93.5964	73.0872
	Pg_S1307.9	Y	cycp3;1	AT2G45080	cycp3;1	21.4787	26.7604	17.117	96.8309	92.6965	80.3056
Cell growth	Pg_S0428.13	Y	AtCXE18, CXE18	AT5G23530	CXE18	559.521	561.969	500.958	755.905	815.369	884.264
	Pg_S0602.11	Y	DET3, ATVHAC	AT1G12840	DET3	572.408	615.49	591.107	941.238	853.167	905.017
	Pg_S0318.51	Y	RAB1C, ATRAB1C, ATRABD2C	AT4G17530	RAB1C	434.944	443.854	414.232	613.262	679.474	679.44
	Pg_S0614.29	Y		AT1G60420	AT1G60420	260.967	181.786	204.263	344.635	330.287	324.832
	Pg_S1717.12	Y	FEI1	AT1G31420	FEI1	358.695	331.276	341.199	558.079	536.379	513.415
	Pg_S3883.5	Y	MUR1, MUR_1, GMD2	AT3G51160	MUR1	292.111	271.296	279.578	424.806	449.983	453.862
	Pg_S0756.11	Y	CDC2B, CDKB1;1	AT3G54180	CDKB1;1	141.76	140.262	173.452	246.763	246.591	240.015
	Pg_S2000.5	Y	RAB1C, ATRAB1C, ATRABD2C	AT4G17530	RAB1C	347.955	323.894	325.223	558.079	542.679	532.363
	Pg_S5025.6	Y	SKU5	AT4G12420	SKU5	641.14	675.47	609.366	1091.17	1070.06	994.346
	Pg_S0898.12	Y	COBL4, IRX6	AT5G15630	IRX6	6.44362	7.38219	25.105	30.1946	35.0987	36.9947
	Pg_S1220.6	Y	POM1, ERH2, ELP1, CTL1, ELP, HOT2, ATCTL1	AT1G05850	POM1	265.262	251.917	211.11	433.136	429.284	341.976
	Pg_S6197.8	Y	EYE	AT5G51430	EYE	424.205	497.375	386.844	735.082	676.774	761.55
	Pg_S4599.13	Y		AT3G16060	AT3G16060	90.2107	104.273	87.8673	145.767	186.293	144.37
	Pg_S1671.36	Y		AT1G24620	AT1G24620	0	0	0	9.37073	9.89962	0.902311
	Pg_S8336.1	Y	FEI1	AT1G31420	FEI1	535.894	570.274	610.507	975.597	935.964	1005.17
	Pg_S1295.29	Y	NTRA, ATNTRA, NTR2	AT2G17420	NTRA	766.791	731.76	742.878	1350.43	1174.46	1284.89
	Pg_S4313.9	Y	ACT7	AT5G09810	ACT7	2654.77	2685.27	2658.84	4531.27	4673.52	4606.3
	Pg_S5111.4	Y	ACT3	AT3G53750	ACT3	80.5452	90.4318	83.3028	137.437	140.395	161.514
	Pg_S1642.9	Y	RIC4	AT5G16490	RIC4	0	0	3.4234	21.865	8.09969	10.8277
	Pg_S0684.12	Y	CESA6, IXR2, E112, PRC1	AT5G64740	CESA6	3218.59	3130.97	3270.49	5656.8	5670.68	5502.29
	Pg_S0590.1	Y	CESA1, RSW1, AtCESA1	AT4G32410	CESA1	1791.33	1737.58	1969.6	3292.25	3373.97	2997.48
	Pg_S3554.24	Y	ATEXPB3, EXPB3, ATHEXP BETA 1.6	AT4G28250	EXPB3	927.881	953.225	880.956	1679.44	1642.44	1682.81
	Pg_S0988.9	Y	CDI	AT1G64980	CDI	223.379	182.709	173.452	391.488	344.687	321.223
	Pg_S0947.1	Y	AtCXE18, CXE18	AT5G23530	CXE18	93.4325	99.6596	78.7383	146.808	185.393	166.025
	Pg_S6252.2	Y	ATEXLB1, EXPR, ATEXPR, ATEXPR1, ATHEXP BETA 3.1, EXLB1	AT4G17030	EXLB1	1.07394	0	1.14113	34.3593	63.8976	15.3393
	Pg_S2798.2	Y	LRX1	AT1G12040	LRX1	0	26.7604	18.2581	56.2244	70.1973	42.4086
	Pg_S0804.17	Y		AT2G34480	AT2G34480	271.706	254.686	255.614	471.66	467.082	515.219
	Pg_S1993.32	Y	CESA6, IXR2, E112, PRC1	AT5G64740	CESA6	4163.65	4293.67	4454.99	7977.61	8128.49	8174.93
	Pg_S3009.13	Y	ANX1	AT3G04690	ANX1	13.9612	14.7644	7.98794	24.9886	44.0983	55.0409
	Pg_S2807.7	Y	CPD, CYP90A, CYP90, CBB3, DWF3, CYP90A1	AT5G05690	CPD	126.725	143.03	152.912	286.328	262.79	252.647
	Pg_S0760.47	Y	PIN3, ATPIN3	AT1G70940	PIN3	49.4011	77.513	62.7624	135.355	118.795	115.496
	Pg_S3092.13	Y	SKU5	AT4G12420	SKU5	65.5101	49.8298	66.1858	137.437	98.9962	113.691
	Pg_S7142.3	Y	COBL4, IRX6	AT5G15630	IRX6	3.22181	14.7644	11.4113	51.0184	70.1973	30.6786
	Pg_S1401.6	Y	NMT1, XPL1, PEAMT	AT3G18000	XPL1	1730.11	1853.85	1939.93	3682.7	3529.66	3575.86
	Pg_S1033.10	Y	DWF4, CYP90B1, CLM, SNP2, SAV1, PSC1	AT3G50660	DWF4	45.1053	51.6753	46.7865	82.2542	106.196	96.5472
	Pg_S5781.7	Y	CESA1, RSW1, AtCESA1	AT4G32410	CESA1	2779.35	2773.86	2850.55	5620.36	5687.78	5678.24
	Pg_S1033.11	Y	DWF4, CYP90B1, CLM, SNP2, SAV1, PSC1	AT3G50660	DWF4	59.0665	76.5902	50.2099	144.726	125.995	114.593
	Pg_S0415.6	Y	RAB1C, ATRAB1C, ATRABD2C	AT4G17530	RAB1C	333.994	333.121	327.505	663.239	719.972	644.25
	Pg_S3468.1	Y	RAB1C, ATRAB1C, ATRABD2C	AT4G17530	RAB1C	187.939	195.628	170.029	389.406	382.485	383.482
	Pg_S2290.6	Y	CESA6, IXR2, E112, PRC1	AT5G64740	CESA6	1491.7	1594.55	1601.01	3433.85	3497.27	3428.78
	Pg_S2953.22	Y	ATFH8, FH8	AT1G70140	FH8	28.9963	12.9188	4.56454	64.5539	66.5975	57.7479
	Pg_S2307.28	Y	COB	AT5G60920	At5g60920	1415.45	1609.32	1411.58	3276.63	3488.27	3394.49
	Pg_S1189.4	Y	CESA6, IXR2, E112, PRC1	AT5G64740	CESA6	1818.17	1812.33	1805.27	4245.98	4326.13	4201.16
	Pg_S0001.1	Y	CESA6, IXR2, E112, PRC1	AT5G64740	CESA6	1188.85	1195.91	1291.76	2806.01	2865.49	3014.62
	Pg_S2472.24	Y	XTH33, XET	AT1G10550	XTH33	23.6266	25.8377	13.6936	53.1008	62.0976	67.6733
	Pg_S0399.30	Y	ATEXLB1, EXPR, ATEXPR, ATEXPR1, ATHEXP BETA 3.1, EXLB1	AT4G17030	EXLB1	169.682	156.872	115.255	467.495	409.484	300.469
	Pg_S3366.4	Y	GASA1	AT1G75750	GASA1	10.7394	20.301	13.6936	37.4829	49.4981	52.334
	Pg_S0683.1	Y	CNGC18, ATCNGC18	AT5G14870	CNGC18	6.44362	1.84555	1.14113	21.865	14.3994	18.9485
	Pg_S1223.12	Y	GA20OX2, AT2353, ATGA20OX2	AT5G51810	GA20OX2	3.22181	6.45942	2.28227	19.7827	35.9986	33.3855
	Pg_S0817.1	Y	CNGC18, ATCNGC18	AT5G14870	CNGC18	18.2569	17.5327	14.8347	52.0596	51.298	39.7017
	Pg_S3979.3	Y	HLS1, COP3, UNS2	AT4G37580	HLS1	1.07394	0.922774	0	14.5767	20.6992	9.92542
	Pg_S7505.4	Y	AtCXE18, CXE18	AT5G23530	CXE18	35.4399	38.7565	74.1737	216.568	182.693	187.681
	Pg_S1715.11	Y	ROT3	AT4G36380	ROT3	125.651	129.188	79.8794	343.593	333.887	359.12
	Pg_S3394.15	Y	ANX1	AT3G04690	ANX1	73.0277	87.6635	84.4439	272.792	268.19	274.302
Nitrate assimilation	Pg_S0052.28	Y	NRT1.7	AT1G69870	NRT1.7	190.087	182.709	195.134	326.934	302.388	308.59
	Pg_S0471.3	Y		AT1G71500	AT1G71500	104.172	116.27	128.948	201.991	196.192	229.187
	Pg_S4183.8	Y	NRT1.1, CHL11, NRT1, B1, ATNRT1, CHL1	AT1G12110	NRT1.1	85.9149	96.8913	108.408	195.744	149.394	186.778
	Pg_S2580.1	Y	GLT1	AT5G53460	GLT1	1813.88	1824.32	1784.73	3568.17	3307.37	3219.44
	Pg_S5533.5	Y	ATNRT1:2, NTL1, NRT1:2	AT1G69850	NRT1:2	38.6617	60.9031	58.1978	99.9544	94.4964	121.812
	Pg_S6223.2	Y	WR3, ATNRT3.1, NRT3.1	AT5G50200	WR3	559.521	466.924	483.841	1044.32	1003.46	959.156
	Pg_S3498.8	Y	ATNRT2:1, NRT2, NRT2;1AT, ACH1, LIN1, ATNRT2.1, NRT2.1, NRT2:1	AT1G08090	NRT2:1	59.0665	62.7486	49.0688	150.973	108.896	106.473
	Pg_S1316.16	Y	ATNRT2.4, NRT2.4	AT5G60770	NRT2.4	127.798	126.42	91.2907	257.174	309.588	277.009
	Pg_S1135.6	Y	ATNRT2.4, NRT2.4	AT5G60770	NRT2.4	89.1367	88.5863	86.7262	201.991	202.492	257.158
	Pg_S0297.29	Y	ATNRT2.5, NRT2.5	AT1G12940	NRT2.5	11.8133	2.76832	11.4113	30.1946	35.9986	41.5063
	Pg_S0368.9	Y	NRT1.5	AT1G32450	NRT1.5	15.0351	5.53664	4.56454	34.3593	36.8986	50.5294
	Pg_S8584.3	Y	NRT1.5	AT1G32450	NRT1.5	20.4048	19.3783	19.3993	84.3366	58.4978	66.771
	Pg_S3574.1	Y		AT2G26690	AT2G26690	175.052	171.636	201.981	667.404	716.373	723.653
Response to JA	Pg_S0288.13	Y	JAZ3, JAI3, TIFY6B	AT3G17860	JAZ3	1833.21	1867.69	1969.6	3074.64	2967.19	2931.61
	Pg_S4916.11	Y	ATMYB4, MYB4	AT4G38620	MYB4	226.601	206.701	184.864	355.047	359.986	287.837
	Pg_S0131.23	Y	PDR12, ATPDR12, ABCG40, ATABCG40	AT1G15520	ABCG40	19.3309	27.6832	17.117	36.4417	77.397	47.8225
	Pg_S2692.14	Y	PDR12, ATPDR12, ABCG40, ATABCG40	AT1G15520	ABCG40	340.438	410.634	341.199	607.015	615.576	597.33
	Pg_S1671.54	Y	JAZ3, JAI3, TIFY6B	AT3G17860	JAZ3	1631.31	1410	1422.99	2389.54	2546	2509.33
	Pg_S0252.34	Y	JAZ1, TIFY10A	AT1G19180	JAZ1	906.403	1006.75	966.541	1609.68	1567.74	1694.54
	Pg_S1124.18	Y	ERF1, ATERF1	AT3G23240	ERF1	206.196	143.953	190.569	300.905	310.488	325.734
	Pg_S0109.21	Y	JAZ1, TIFY10A	AT1G19180	JAZ1	4798.35	4770.74	4709.46	8295.18	8114.09	8414.95
	Pg_S4133.6	Y	BT2, ATBT2	AT3G48360	BT2	27.9224	46.1387	57.0567	105.16	71.0973	93.8403
	Pg_S1675.11	Y	PDR12, ATPDR12, ABCG40, ATABCG40	AT1G15520	ABCG40	118.133	63.6714	45.6454	171.797	153.894	216.555
	Pg_S0131.22	Y	PDR12, ATPDR12, ABCG40, ATABCG40	AT1G15520	ABCG40	24.7005	14.7644	11.4113	31.2358	52.198	56.8456
	Pg_S1886.12	Y	CYT1	AT2G39770	CYT1	263.114	259.299	277.296	503.937	503.981	446.644
	Pg_S5623.6	Y	JAZ3, JAI3, TIFY6B	AT3G17860	JAZ3	2374.47	2278.33	2326.77	4127.29	4289.24	4304.02
	Pg_S7955.1	Y	ATMYC2, RD22BP1, JAI1, JIN1, MYC2, ZBF1	AT1G32640	MYC2	1639.9	1571.48	1553.08	2877.86	2989.69	2855.81
	Pg_S0534.55	Y	CHS, TT4, ATCHS	AT5G13930	TT4	533.747	514.908	491.829	932.908	1010.66	885.167
	Pg_S3453.5	Y	JAZ1, TIFY10A	AT1G19180	JAZ1	4640.48	5029.12	4919.43	9834.06	9433.44	9549.15
	Pg_S1033.10	Y	DWF4, CYP90B1, CLM, SNP2, SAV1, PSC1	AT3G50660	DWF4	45.1053	51.6753	46.7865	82.2542	106.196	96.5472
	Pg_S0403.6	Y	PDR12, ATPDR12, ABCG40, ATABCG40	AT1G15520	ABCG40	259.893	241.767	259.037	544.543	502.181	476.42
	Pg_S2784.11	Y	ATAO1, AO1	AT4G14940	dl3510w	95.5804	89.5091	116.396	218.65	188.093	200.313
	Pg_S1367.9	Y	RAX2, MYB38, ATMYB38, BIT1	AT2G36890	RAX2	47.2532	26.7604	42.222	72.8834	89.9966	95.6449
	Pg_S1033.11	Y	DWF4, CYP90B1, CLM, SNP2, SAV1, PSC1	AT3G50660	DWF4	59.0665	76.5902	50.2099	144.726	125.995	114.593
	Pg_S3643.12	Y	JAZ1, TIFY10A	AT1G19180	JAZ1	1773.07	1843.7	1921.67	3720.18	3634.06	3891.67
	Pg_S8551.1	Y	MYB73, ATMYB73	AT4G37260	MYB73	75.1756	101.505	54.7744	190.538	192.593	156.1
	Pg_S2692.11	Y	PDR12, ATPDR12, ABCG40, ATABCG40	AT1G15520	ABCG40	2286.41	2472.11	2169.3	4790.53	5065.91	4639.68
	Pg_S6412.2	Y	GL3, MYC6.2	AT5G41315	GL3	414.54	417.094	462.159	914.167	933.264	889.678
	Pg_S8341.2	Y	ILL6	AT1G44350	ILL6	799.009	835.11	858.133	1620.09	1773.83	1885.83
	Pg_S0624.3	Y	RGL1, RGL	AT1G66350	RGL1	16.109	23.9921	12.5525	37.4829	53.9979	61.3571
	Pg_S3059.1	Y	LOX1, ATLOX1	AT1G55020	LOX1	4.29575	17.5327	11.4113	53.1008	36.8986	35.1901
	Pg_S6734.2	Y	MMP	AT1G70170	MMP	0	0.922774	0	14.5767	13.4995	5.41386
	Pg_S3814.2	Y	LOX1, ATLOX1	AT1G55020	LOX1	299.628	337.735	303.542	842.324	721.772	784.108
	Pg_S0095.4	Y	ILL6	AT1G44350	ILL6	737.794	872.021	914.048	2221.9	2293.11	2214.27
	Pg_S3622.9	Y	LOX2, ATLOX2	AT3G45140	LOX2	18276.3	18735.1	18845.8	50576.9	51132.4	48958.5
	Pg_S8300.1	Y	RGL1, RGL	AT1G66350	RGL1	8.59149	21.2238	15.9759	47.8948	69.2973	64.064
	Pg_S1698.5	Y	ATAO1, AO1	AT4G14940	dl3510w	115.985	105.196	115.255	301.946	394.185	329.343
	Pg_S0213.26	Y	JAZ2, TIFY10B	AT1G74950	TIFY10B	133.168	104.273	140.359	419.6	390.585	398.821
	Pg_S3814.3	Y	LOX1, ATLOX1	AT1G55020	LOX1	52.6229	28.606	41.0808	140.561	187.193	195.801
	Pg_S3574.1	Y		AT2G26690	AT2G26690	175.052	171.636	201.981	667.404	716.373	723.653
	Pg_S1410.19	Y	ERF1, ATERF1	AT3G23240	ERF1	5.36968	2.76832	2.28227	59.348	50.3981	86.6218
	Pg_S3560.17	Y	JAZ2, TIFY10B	AT1G74950	TIFY10B	395.209	381.106	378.857	1699.23	1646.94	1609.72
	Pg_S2920.8	Y	TIFY10A	AT1G19180	JAZ1	489.715	544.437	528.345	2247.93	2408.31	2258.48
	Pg_S1907.21	Y	AOS, CYP74A, DDE2	AT5G42650	AOS	598.183	621.027	610.507	5957.7	5653.58	5816.29
	Pg_S5342.1	Y	AOS, CYP74A, DDE2	AT5G42650	AOS	345.808	378.337	413.091	3821.18	3835.65	3639.92
